# Supplementary material
Source: MDPI journal article supplement (https://www.mdpi.com/2071-1050/13/11/5815)
Supplement: s1 [file s1]

# Traditional foods and sustainable rural development: exploiting the case of the Comoros tea as a potential source of bioactive compounds

Dario Donno <sup>1,\*</sup>, Saandia Hassani <sup>2</sup>, Toilibou Sofoini <sup>3</sup>, Maria Gabriella Mellano <sup>1</sup>, Isidoro Riondato <sup>1</sup>, Giovanni Gamba <sup>1</sup>, and Gabriele Loris Beccaro <sup>1</sup>

<sup>1</sup> Dipartimento di Scienze Agrarie, Forestali e Alimentari, Università degli Studi di Torino, ITALY; dario.donno@unito.it; gabriella.mellano@unito.it; isidoro.riondato@unito.it; giovanni.gamba@unito.it; gabriele.beccaro@unito.it

<sup>2</sup> École National de Cuisine et d'Application - CODCOM, COMOROS ISLANDS; saandiacodcom@gmail.com

<sup>3</sup> Faculté des Sciences et Techniques, Université des Comores, COMOROS ISLANDS; toilibousofoini@yahoo.fr

\* Correspondence: dario.donno@unito.it; Tel.: +39-011-670-8751 (D.D.)

## Solvents and chemicals

Sodium carbonate, Folin-Ciocalteu phenol reagent, sodium acetate, citric acid, potassium chloride, hydrochloric acid, iron(III) chloride hexahydrate, 2,4,6-tripyridyl-S-triazine (TPTZ), 1,2-phenylenediamine dihydrochloride (OPDA), all polyphenolic (caffeic acid, chlorogenic acid, coumaric acid, ferulic acid, hyperoside, isoquercitrin, quercetin, quercitrin, rutin, ellagic acid, gallic acid, (+)-catechin, (-)-epicatechin, castalagin, and vescalagin) and terpenic standards (limonene, phellandrene, sabinene,  $\gamma$ -terpinene, and terpinolene), carotenoids ( $\alpha$ -carotene,  $\beta$ -carotene,  $\beta$ -cryptoxanthin, lutein, lycopene, zeaxanthin), potassium dihydrogen phosphate, phosphoric acid and HPLC-grade methanol, tert-Butyl methyl ether, dichloromethane, and acetonitrile were purchased from Sigma-Aldrich (St. Louis, MO, USA). Ethylenediaminetetraacetic acid disodium salt was purchased from AMRESCO (Solon, OH, USA). Sodium fluoride was purchased from Riedel-de Haen (Seelze, Germany). Milli-Q ultrapure water was produced by Sartorius Stedim Biotech mod. Arium (Sartorius, Göttingen, Germany). Cetyltrimethylammonium bromide (cetrimide), ascorbic acid (AA) and dehydroascorbic acid (DHAA) were purchased from Extrasynthèse (Genay, France). Acetic acid, ethanol, organic acids (citric acid, malic acid, oxalic acid, quinic acid, succinic acid, and tartaric acid) and HPLC-grade formic acid were purchased from Fluka BioChemika, Buchs, Switzerland.

## Extraction protocols

**Table S1.** Protocols for the extraction of bioactive compounds and nutritional substances.

| Chemical class                 | Sample Weight | Extraction Solvents                                                                                        | Time of Extraction | Homogenisation | Centrifugation      | Number of Successive Extraction | Other Actions                                                                                      |
|--------------------------------|---------------|------------------------------------------------------------------------------------------------------------|--------------------|----------------|---------------------|---------------------------------|----------------------------------------------------------------------------------------------------|
| Polyphenolic compounds         | 10 g          | methanol : bi-distilled water, 95:5 v/v, pH adjusted with 1.5 mL of 37% HCl (25 mL)                        | 60 min in the dark | 1 min          | 15 min at 3,000 rpm | 3                               | /                                                                                                  |
| Organic acids and monoterpenes | 5 g           | 95% ethanol (25 mL)                                                                                        | 30 min in the dark | 1 min          | 10 min at 4,000 rpm | 2                               | /                                                                                                  |
| Vitamin C                      | 5 g           | 0.1 M citric acid, 2 mM EDTA disodium salt, and 4 mM sodium fluoride in methanol – water, 5:95 v/v (10 mL) | 20 min in the dark | 1 min          | 10 min at 4,000 rpm | 2                               | Supernatant acidified with 4 N HCl (pH = 2.2–2.4 ) and centrifuged for 5 min at 12,000 rpm at 4 °C |
| Carotenoids                    | 5 g           | methanol : tert-butyl methyl ether, 70:30 v/v (35 mL)                                                      | 30 min in the dark | 1 min          | 15 min at 4,000 rpm | 2                               | /                                                                                                  |

## Chromatographic analysis

**Table S2.** Chromatographic conditions of the used HPLC methods.

| Method | Classes of Interest       | Stationary Phase                          | Mobile Phase                                                                                                                                          | Wavelength<br>(nm) |
|--------|---------------------------|-------------------------------------------|-------------------------------------------------------------------------------------------------------------------------------------------------------|--------------------|
| A      | cinnamic acids, flavonols | KINETEX – C18 column (4.6 × 150 mm, 5 µm) | A: 10 mM KH <sub>2</sub> PO <sub>4</sub> /H <sub>3</sub> PO <sub>4</sub> , pH = 2.8<br>B: CH <sub>3</sub> CN                                          | 330                |
| B      | benzoic acids, catechins  | KINETEX – C18 column (4.6 × 150 mm, 5 µm) | A: H <sub>2</sub> O/CH <sub>3</sub> OH/HCOOH (5:95:0.1 v/v/v), pH = 2.5<br>B: CH <sub>3</sub> OH/HCOOH (100:0.1 v/v)                                  | 280                |
| C      | monoterpenes              | KINETEX – C18 column (4.6 × 150 mm, 5 µm) | A: H <sub>2</sub> O<br>B: CH <sub>3</sub> CN                                                                                                          | 250                |
| D      | organic acids             | KINETEX – C18 column (4.6 × 150 mm, 5 µm) | A: 10 mM KH <sub>2</sub> PO <sub>4</sub> /H <sub>3</sub> PO <sub>4</sub> , pH = 2.8<br>B: CH <sub>3</sub> CN                                          | 214                |
| E      | vitamins                  | KINETEX – C18 column (4.6 × 150 mm, 5 µm) | A: 5 mM C <sub>16</sub> H <sub>33</sub> N(CH <sub>3</sub> ) <sub>3</sub> Br/50 mM KH <sub>2</sub> PO <sub>4</sub> , pH = 2.5<br>B: CH <sub>3</sub> OH | 261, 348           |
| F      | carotenoids               | KINETEX – C18 column (4.6 × 150 mm, 5 µm) | A: ACN<br>B: CH <sub>3</sub> OH<br>C: CH <sub>2</sub> Cl <sub>2</sub>                                                                                 | 450                |

### *Elution conditions*

Method A, gradient analysis: 5%B to 21%B in 17 min + 21%B in 3 min (2 min conditioning time); flow: 1.5 mL min<sup>-1</sup>

Method B, gradient analysis: 3%B to 85%B in 22 min + 85%B in 1 min (2 min conditioning time); flow: 0.6 mL min<sup>-1</sup>

Method C, gradient analysis: 30%B to 56%B in 15 min + 56%B in 2 min (3 min conditioning); flow: 1.0 mL min<sup>-1</sup>

Method D, gradient analysis: 5%B to 14%B in 10 min + 14%B in 3 min (2 min conditioning time); flow: 0.6 mL min<sup>-1</sup>

Method E, isocratic analysis: ratio of phase A and B: 95:5 in 10 min (5 min conditioning time); flow: 0.9 mL min<sup>-1</sup>

Method F, isocratic analysis: ratio of phase A, B and C: 75:20:5 in 20 min (5 min conditioning time); flow: 1.0 mL min<sup>-1</sup>
